# Supplementary material for: Evidence for an Association Between Hearing Impairment and Disrupted Sleep: Scoping Review
Source: Am J Audiol. 2019 Oct 17;28(4):1015–24. doi: 10.1044/2019_AJA-19-0026 (PMC7210437; doi:10.1044/2019_AJA-19-0026)
Supplement: Supplemental Material 1. [file AJA-28-1015-s001.xlsx]

## Sheet: Sheet1
Authors	Year	City/Country	Main aims	No. of participants	Age of Participants	Intervention	Study Design	Hearing loss measurements	Hearing loss of participants	Management of hearing loss (e.g., use of amplification during the day)	Sleep measurements	Sleep of participants	Other outcome measures	Presence and severity of tinnitus	Main findings	Future research suggestions
Asplund	2003	Sweden	To investigate the relationship between hearing complaints and sleep and daytime sleepiness in elderly participants	6,143 evaluable questionnaires	The ages (mean/SD) of the male and female participants were 73.09/6.0 and 72.69/6.7 years, respectively.	N/A	Cohort postal survey	Binary self-report "I have good hearing"	Self-reported "no"	Not discussed	Night sleep assessed with binary self-report of questions "I have a good nights sleep," "I often wake up at night" and "I easily fall asleep again after a nocturnal awakening"	Poor according to binary self-report Frequent daytime sleepiness (DS) was reported by 32.9% of the men and 23.2% of the women. DS and napping were more common in subjects with hearing complaints	n/a	Not reported	Poor hearing was associated with increased frequency of daytime sleepiness independent of health quality. This group also reported poor sleep, more frequent awakenings and difficulty returning to sleep if awoken Increasing age was associated with daytime sleepiness only among men and women ≥ 80 years versus < 70 years.	None suggested
Dalton et al.	2003	United States	To investigate the impact of hearing loss on QoL in large group of older adults	2,688 with audiometric data	69-years (43-84 range)	N/A	Prospective cohort longitudinal study	PTA at 250 Hz to 8000 Hz, but averaged across 500, 1000, 2000 and 4000 Hz in either ear	n = 740 (mild, 26-40 dB HL). N = 640 (moderate to severe, > 40 dB Hl). No hearing loss (n = 1281)	Subset analyses excluded hearing aid wearers: 213 (15.6%) of individuals classified as having a hearing loss currently used a hearing aid (2.6% with mild hearing loss and 31.1% with moderate to severe hearing loss).	"Sleep problems" item on descriptive characteristics. Information informing "sleep problems" was obtained by interview.	More sleep problems in mild and moderate (52.5%) and severe hearing impaired groups (52.65) than in the no hearing loss group (46.6). Statistically significant difference, p = .006.	Hearing Handicap for the Elderly (HHIE-S), activities of daily living (ADL), instrumental (IADL) and short form 36 health survey (SF-36)	Not reported	Study found statistically significant (p = .006) difference between "sleep problems" variable in no HL, mild HL and mod-severe HL groups.	None relevant to review question
Danerkmark and Gellerstedt	2004	Sweden	To describe the health status of hearing-impaired individual's working life in terms of psychosocial wellbeing and discuss these in relation to a Demand-Control model	445	53, range = 20-64	N//A	Prospective clinical questionnaire	PTA averaged at 500, 1000, 2000 Hz in the best ear	Mostly mild loss (mean 31 dB, SD = 19), 9% participants had "marked hearing loss with "PTA greater than or equal to 56%"	Questions asked about hearing aids, and use of hearing aids at work, but not specified	Question item concerning "sleep problems," not specified	More sleep problems in high and low stress hearing impaired women than other groups	Municipal Environmental Questionnaire adapted to the Demand-Control model	Asked about presence of tinnitus in questionnaire - not defined, 49% of the sample reported its presence.	Hearing impaired individuals with high stress jobs reported the highest amount of health problems compared to other groups in study (grouped by demand-control theory into high stress, low stress, active and passive), high stress individuals reported more sleep problems	Further research into the mechanisms in the psychosocial work environment that produce health problems and lack of wellbeing amongst hearing-impaired workers
Hasson et al.	2011	Stockholm, Sweden	To assess the prevalence of hearing complaints and tinnitus in relation to different work and health-related stressors	9756	Mean age was 48.6 (± 10.8) for men and 48.2 (± 10.5) for women. Range 18-64-year-old. Age distribution was: under 40 years 1,148 (26%) men and 1,314 (25%) women; 41 ± 51 years 1,202 (27%) men and 1,520 (29%) women; 51-60 years 1,415 (32%) men and 1,754 (33%) women; 60 years or older 697 (26%) men and 706 (13%) women.	N/A	Cohort postal survey	Self-report hearing complaints. How difficult is it for you to (without hearing aid) hear what is said in a conversation between several persons? (Not difficult at all, Not very difficult, Quite difficult, Very difficult)	Reported struggling to hear in conversation in a group, confirmed by difficult or quite difficult response	Uncertain - participants asked to report hearing status without use of hearing aid	Self-report asking question "How do you sleep in general?" Responses ranged from 1 (very poor) to 5 (very good) on a 5-graded Likert scale.	Approximately 40% of participants reporting either "bad" or "quite bad" sleep quality had self-reported tinnitus, hearing complaints or both	Self reported stressors/threats, health, long-term illness, burnout and long lasting stress	Asked to report if they'd had tinnitus in a "recent time" lasting more than 5 minutes	Poor sleep quality associated with "hearing problems," i.e., the combined variable, but there was a statistically significantly higher prevalence in those reporting tinnitus compared to hearing complaints	Hearing problems are multidimensional which warrants further investigation of possible predictors
Jansson-Fröjmark	2012	Sweden	To examine the effects of CBT-I on insomnia patients with co-morbid hearing impairment	32 (CBTi = 17, WLC = 15)	CBT-I: mean = 57.8 (SD = 6.6), WLC: mean = 53.6 (SD = 10.4)	CBT-I	Randomized control trial with repeated measures follow-up	PTA averaged at 500, 1000, 2000, 4000 Hz according to criteria of European Concerted Action Project on Genetics of Hearing Loss (HEAR)	Mix of mild and moderate PTA of CBTi = 39.2 (8.5), and of WLC = 33.1 (10.6)	None	Insomnia Severity Index (ISI) and sleep diaries (including measures of sleep onset latency and wake after onset latency, tapping total wake time, total sleep time, sleep restoration and sleep quality)	Complaints: Sleep onset (CBTi = 5.9%, WLC = 20.0%) Sleep maintenance (CBTi = 35.3%, WLC = 46.7%) or mixed problems (CBTi = 58.8%, WLC = 33.3%). Baseline data - ISI: CBT-I = 17.6 (SD 4), WLC = 19 (SD 5.7), TWT (mins) - CBT-I = 117.7 (SD 45.2), WLC = 111.4 (SD 50.1), TST (min) - CBT-i = 343.9 (SD 85.7), WLC = 361.7 (SD 55.8), Sleep restoration - CBT-i = 4.3 (SD 1.6), WLC = 4.1 (SD 1.8), Sleep quali…	Work and social adjustment scale (WSAS), Hospital anxiety and depression scale (HADS)	Excluded "constant distressing" Grade 3 tinnitus according to the Klockhoff and Lindblom 1967 scale	Compared to waiting list control, those receiving CBT-I has lower insomnia severity post-treatment and at follow-up. Also found there to be reduced wake time, increased sleep restoration and quality. Also increased function and lower anxiety	Further research into the benefits of CBT-I for insomnia comorbid with hearing-impairment
Nakajima et al	2014	Saitama, Japan	To determine whether subclinical hearing loss is associated with sleep duration and cardiometabolic risk factors	48,091 in a cross-sectional study, and 6,674 in an 8-year longitudinal study.	mean 42.3	N/A	Cross-sectional and longitudinal arms	PTA at 1000 to 4000 Hz 1000 AND 4000, only these two frequencies tested	"Ssubclinical" defined as average > 25 dB HL at these frequencies	Hearing aids and pharmacotherapy were excluded	Sleep duration self-reported by 5-category scale (less than or equal to 5, 6, 7, 8, greater than or equal to 9)	≤ 5 hours = 10.5%, 6 hours = 46.5%, 7 hours = 31.4%, 8 hours = 10.8%, ≥ 9 hours = 0.8%.	Confounds measured on custom form	1396 participants also had tinnitus, measured as confound, "usually mild" - further measurement not described	Hearing loss is independently associated with longer sleep duration and cardiometabolic risk factors, relative risk increases with age of hearing loss even when controlling for age and other potential confounding variables. Prevalence of hearing loss at 4 kHz increased significantly with increasing sleep duration at all age strata (except 20-39 year olds)	Objective measures of sleep should be made, preferably using actigraphy. Other socioeconomic variables should be measured, such as education and annual income. Other means to detect subclinical hearing loss (such as whispered voice or rubbing of fingers) may be useful. Future studies should also consider measuring nocturnal awakening, insomnia, nocturia, daytime napping, and difficulties with fal…
Lim et al.	2017	Republic of Korea	To investigate the association between hearing impairment and insomnia in noise exposed male workers	809	43.7, SD = 5.8 (normal hearing); 46.8, SD = 6 (HI)	N/A	Prospective, cross-sectional	PTA 1-4 kHz	1000 Hz to 4000 Hz, greater than 25 dB Hl at any frequency measures n = 532	Uncertain - not described	Insomnia Severity Index Test. 7 questions, 1-4 response. 28 total. 0-14 = absence of insomnia and 15-28 = presence of insomnia.	0.039 difference between HI and normal hearing groups on ISI. HI groups scored higher/had worse sleep 13.3% of HI reported insomnia, compared to 7.9% with normal hearing.	Various occupational health and demographic measures (including cholesterol, blood pressure, alcohol consumption)	None	PTA thresholds at 1-2 kHz in right ear and 1 kHz were considerably higher among workers with insomnia. odds ratio of insomnia for hearing impairment was 1.806 after multiple logistic regression (CIs 1.022-3.188, p = .042) after adjusting for other variables	Further research is required to assess the impact of insomnia on hearing impairment with respect to sex, and the relationship between hearing impairment, tinnitus and insomnia.
Zarenoe et al.	2017	Sweden	To compare a group of patients with SNHL + tinnitus against a control group of only SNHL when fitted with HAs, investigating WM performance, sleep and hearing problems before and after hearing rehabilitation	100	59.6 (10.1) vs 70.2 (7.2) unmatched (92 participants) and 65.1 (7.6) vs 66.4 (6.1) when age matched (n = 30 per group)	hearing aids for all plus half motivational interviewing, half "standard" fitting procedure	Clinical, prospective, repeated measures	PTA (average of 0.5, 1, 2, and 4 kHz)	( >20 dB HL between ears) PTA: hearing loss and tinnitus = 22.3 (12.0), hearing loss = 32.0 (9.8). In matched group, PTA of hearing loss and tinnitus = 26.1 (10.4) and hearing loss = 29.6 (9.9).	Hearing aids fitted with either motivational fitting or a standard fitting procedure	PSQI	PSQI of hearing loss and tinnitus group = 10.1 (3.7) at baseline and 8.0 (2.8) at follow-up, and for hearing loss group = 7.8 (3.6) at baseline and 8.1 (3.5) at follow-up. In the matched group PSQI for the tinnitus and hearing loss group was 9.7 (3.8) at baseline and 7.7 (2.6) at follow-up, and for the hearing loss group was 7.4 (3.7) at baseline and 7.5 (3.4) at follow-up.	Reading Span, HHIE, THI, HINT	THI = 35.7 (21.7) at baseline and 23.8 (16.8) at follow-up in the tinnitus+hearing loss group, and 30.7 (20.4) at baseline and 22.1 (17.6) at follow-up.	There was statistically significant worse score in tinnitus + hearing loss compared with hearing loss alone on PSQI at baseline in both full and age-matched analysis, less sig in smaller age matched sample (0.002 up to 0.015). There were reduced scores indicating sleep improvement after rehab in the HI + tinnitus group, but not HI alone.	None relevant to review question
Ringdahl and Grimby	2000	Sweden	To measure health-related quality of life in severe-to-profound post-lingually deafened adults	HI = 311, Healthy control = 2356	HI = 71 median and 66 year old mean, Healthy controls = not reported	N/A	Prospective, cross-sectional	PTA at 500, 1000 and 2000 Hz, speech audiometry	Mean pure-tone average of the frequencies 0.5, 1.0 and 2.0 of the better ear was 86 dB HL (SD 14.2 dB). maximum speech recognition score for unaided Swedish phonemically balanced monosyllabic 50-word list was 56% (SD 23%, range 0–96%, n = 175), for the best ear and 31% (SD 28%, range 0–88%, n = 175) for the poorer ear	Hearing aid usage (84%)	Nottingham Health Profile - sleep dimension	Regression models explaining variance on sleep dimension of NHP: (1) sex, age, civil status, other handicaps, pure-tone average, uses hearing aid, satisfaction with hearing aid and full-time work (n = 311) explain 0.06, (2) Independent variables: sex, age, civil status, pure-tone average, uses hearing aid, satisfaction with hearing aid and full-time work. Subjects with other handicaps deleted. (n…	None reported	Not reported	PTA explains some variance in sleep domain as part of regression models. Differences in psychosocial and energy domains rather than physical domains (including mobility, pain and sleep) are more "significant" in hearing-impaired than hearing participants.	None suggested
Scrofani et al.	1996	Catania, Italy	To investigate the effects on SS activity of a pathological deafferentation of sensory and somatosensitive inputs in man.	Group A (5), Group B (4), Group C (4), Control group = 8, total n = 21	Group A = mean age 50.8-+5.5, range 45-57 yrs. Group B = mean age 28.7-+10.3, range 20-40 yrs, Group C = mean age 36.0-+16.7, range 22-60 yrs	N/A	Prospective, cross-sectional	BSAEP (brain stem auditory evoked potential)	"deaf from birth from rubella"	Not reported	EEG with SS analysis	Group B, Sleep spindle density = 12.7(r) 12.8(l), frequency = 17.4(r) 17.1(l), duration = 1.3(right) 1.3(left), index = 27.1(right) 27.1(left)	None	Not reported	Statistically significant increases in SS activity (density and duration) in all three groups, including deaf (Group B) compared to controls	None suggested
Test et al.	2011	Clalit, Israel	To assess association between sleep quality and hearing impairment due to prolonged exposure to industrial noise	298 (HI = 99, none hearing impaired = 199)	no HI group = 42.69 ± 10.41, HI group = 52.66 ± 8.60	N/A	Prospective, cross sectional	PTA performed across 7 frequencies (250 Hz, 500, 1000, 2000, 3000, 4000, 6000, 8000 Hz),	HI defined as "average decrease greater than 25 dBA in the 1000-4000 Hz range"	Not reported	Mini Sleep Questionnaire (MSQ)	Higher median scores on MSQ (none HI = 16, range = 10-48, HI = 24, range = 10-64, p = .005	Health and occupational characteristic questionnaire	Measured by "yes" or "no" question, None HI group = 28 (14.1%), HI = 50 (51%)	Tinnitus was main sleep disrupting factor amongst workers, but hearing impairment was also independently associated with sleep disruption, particularly insomnia independent of age and no. of years of noise exposure.	More audiometric tests in a longer cohort study that will include additional exposure and outcome data.
Tomioka et al.	2015	Japan	To investigate the relationship between self-reported hearing loss and 5-year cognitive decline in higher-level functional capacity in high-functioning elderly adults	3936	72-years, all 65 or over	N/A	Prospective longitudinal cohort study	Self-reported HL was assessed by asking a single question: “Do you feel you have hearing loss?” Possible answers were “yes,” “no,” and “I don’t know.”	Answered "yes"	Unclear - Some respondents were hearing aid users and "asked to evaluate hearing while wearing their devices"	Pittsburg Sleep Quality Index (PSQI) was taken at baseline	31.9% without self-reported hearing impairment had PSQI (> 5.5) for hearing impaired participant group, poor sleep compared to 37.6% (p < .01)	Tokyo Metropolitan of Gerontology Institute Index of Competence… (TMGI-IC), structured interviews, anthropometric and biochemical tests (automatic scale and blood lipid profile)	Not reported	A statistically significantly higher proportion of people with worse sleep scores according to PSQI was found amongst elderly adults reporting hearing loss compared to those without	None relevant to review question
Velluti et al.	2010	Montevideo, Uruguay	To demonstrate the effect of auditory input on sleep for intra-cochlear implanted patients	9 (4 implanted)	mean not reported, range 19-65 years	ON/OFF implant condition in CI group	Quasi-experimental, repeated measures	Speech audiometry (vowel and consonant recognition and speech tracking results provided for the 4 cochlear implants participants)	Profoundly post-lingually deaf	Cochlear implants in CI group, none in deaf control group	PSG, hypnograms and EEG with spectral analysis	"Sleep stages closely resemble the percentages of normal hearing subjects taking into account the well known variability." Within group significant decrease in Stage 2 and PS sleep and increase in Stages 3 and 4 when implant switched on condition. Contralateral cortical (temporal region) shifts in EEG frequency band spectra distribution.	None reported	Not reported	Sleep organization was normal with all 9 participants (5 deaf and 4 implant ON conditions), BUT 4 implant ON nights exhibited new sleep organization but changes in power spectrum in EEG.	None suggested
Werngren and Elgstrom	2003	Sweden	To investigate health-related quality of life (expressed as subjective wellbeing and perceived symptoms) amongst pre-lingually deafened elderly adults using sign language	45 respondents participated in interview	mean 75 (65-92 range)	N/A	Prospective, cross-sectional	None	Profoundly pre-lingually deafened	n/a	Livingston's Sleep Disturbance Scale	73% suffered insomnia, 87% from interruptions and 56% from inability to return to sleep. Median score of 6 on sleep mental wellbeing item of GQL.	Parts of Gothenburg Quality of Life (GQL), Geriatric Depression Scale (GDS), interviews with participants	Not reported	Prevalence of insomnia markedly higher amongst pre-lingually deafened persons using sign language.	None suggested
Nakayama et al.	2010	Nagoya, Japan	To evaluate sleep quality in Meniere's disease patients with the use of PSG	Study group = 35, control group = 35	58 mean (31-71 range)	N/A	Prospective, cross-sectional	MD diagnosed according to American Academy of Otolaryngology	Not specified	None reported	PSG - various indices of sleep architecture analyzed were total sleep time (TST), sleep efficiency (TST divided by time in bed), percentage of sleep stages, apnea index (AI), hypopnea index (HI), and apnea hypopnea index (AHI)	TST: MD = (range 252-509.5 min, mean 406 min), Controls = (range 188-462 min, mean 359.6 min) Sleep stages were divided into stages: 1, 2, 3+4, and REM. Stage 1 ranged from 2.5% to 87.1% (mean 22.4%) in Ménière’s disease and 1.9% to 53.9% (mean 20.7%) in controls (not significant). Stage 2 ranged from 14.2% to 83.2% (mean 58.7%) in Ménière’s disease and was significantly higher (p < .01) than con…	None	Some patients chief complaint was tinnitus - not specified further	Total sleeping time statistically significantly longer in duration in MD than controls. Stage 2 sleep longer, Stages 3 and 4 shorter and a higher arousal index than controls	None suggested
Nakajima et al.	2018	Tokyo, Japan	To investigate the association between subclinical hearing loss (SHL) and self-reported restorative sleep (RS) in a different database of middle-aged and elderly Japanese people	Intact hearing = 29,024 (85.6), Unilateral SHL = 2435 (7.2), bilateral SHL = 2429 (7.2)		N/A	Cross-sectional, retrospective	Pure tone audiometry (total frequencies assessed not reported)	SHL was defined as a pure-tone average hearing loss of > 25 dB at high (4000 Hz) and low (1000 Hz) frequencies	Not reported	RS was determined based on a positive response to the question “Do you get sufficient rest from sleep?”	Odds ratio for bilateral SHL, Model 3 (i.e., adjusted for sleep influencing variables) describing odds of RS with SHL at 4 kHz = 1.22 (1.11–1.34)***	None reported	Not reported	This study determined that bilateral SHL (defined as > 25 dB at 4000 Hz), which may reflect hearing thresh-old elevation in aging, was significantly associated with RS, independent of relevant confounders, including age, sex, and cardiometabolic risk factors.	Detailed assessment of sleep quality, for example, by polysomnography and a specialized questionnaire as in previous studies, and of hearing loss (particularly including other frequencies) is required to elucidate the features of RS and impaired hearing.
